# Supplementary material for: A highly efficient and selective turn-on fluorescent sensor for Cu2+ ion based on calix[4]arene bearing four iminoquinoline subunits on the upper rim
Source: Royal Society of Chemistry journal article supplement (doi:10.1039/b800258d), 2008-01-01
Supplement: b800258d.pdf [file b800258d.pdf]

## Electron Supplementary Information

### A highly efficient and selective turn-on fluorescent sensor for Cu<sup>2+</sup> ion based on calix[4]arene bearing four iminoquinoline subunits on the upper rim

Guang-Ke Li,<sup>ab</sup> Zhen-Xiang Xu,<sup>ab</sup> Chuan-Feng Chen\*<sup>a</sup> and Zhi-Tang Huang\*<sup>a</sup>

<sup>a</sup>Beijing National Laboratory for Molecular Sciences, Center for Chemical Biology, Institute of Chemistry, Chinese Academy of Sciences, Beijing 100080, China. <sup>b</sup>Graduate School, Chinese Academy of Sciences, Beijing 100049, China.

cchen@iccas.ac.cn; huangzt@public.bta.net.cn

### Contents

|                                                                                           |    |
|-------------------------------------------------------------------------------------------|----|
| (1) Synthesis of compounds 1, 2, 5, 6-----                                                | S2 |
| (2) General procedures for the titration experiments -----                                | S3 |
| (3) Job plot of compound 1 with Cu <sup>2+</sup> -----                                    | S3 |
| (4) Absorption spectra of 1 with Cu <sup>2+</sup> and Zn <sup>2+</sup> -----              | S4 |
| (5) Fluorescent titration of 1 with Zn <sup>2+</sup> -----                                | S5 |
| (6) Fluorescent titration of 2 with Cu <sup>2+</sup> -----                                | S5 |
| (7) Plot of fluorescence intensity versus metal ion concentration -----                   | S6 |
| (8) ESI mass spectra of 1-Cu <sup>2+</sup> and 1-Zn <sup>2+</sup> -----                   | S7 |
| (9) The <sup>1</sup> H NMR titration of compound 1 with Zn <sup>2+</sup> -----            | S8 |
| (10) The <sup>1</sup> H NMR and <sup>13</sup> C NMR spectra of compounds 1, 2, 4, 6 ----- | S9 |

## (1) Synthesis of compounds 1, 2, 4, 6

### General procedure for the synthesis of nitro-calix[4]arene derivatives

To a solution of calix[4]arene **3** or **5** (0.3 mmol) in a mixture of CH<sub>2</sub>Cl<sub>2</sub> (6 mL) and glacial acetic acid (6 mL) was added 100% HNO<sub>3</sub> (2 mL) for **3** at 0 °C and 65% HNO<sub>3</sub> (0.4 mL) for **5** at room temperature. The reaction mixture was stirred for 3~7h and subsequently poured into water (30 mL). The water layer was extracted with CH<sub>2</sub>Cl<sub>2</sub> (2×25 mL). The combined organic layers were washed with water (2×25 mL) and then evaporated to obtain a solid residue. The crude reaction products were further purified by recrystallization from CH<sub>2</sub>Cl<sub>2</sub> and CH<sub>3</sub>OH to give the pure compounds.

### 25,26,27,28-Tetrakis(ethoxymethoxy)-5,11,17,23-tetranitrocalix[4]arene (**4**)

Yield: 84 %. Mp: 199-200 °C. <sup>1</sup>H NMR (CDCl<sub>3</sub>, 300 MHz): δ 7.58 (s, 8H), 4.65 (d, *J* = 14.0 Hz, 4H), 4.22 (t, *J* = 4.4 Hz, 8H), 3.75 (t, *J* = 4.7 Hz, 8H), 3.38 (d, *J* = 14.0 Hz, 4H), 3.37 (s, 12H). <sup>13</sup>C NMR (CDCl<sub>3</sub>, 75 MHz): δ 161.5, 143.1, 135.5, 124.0, 74.3, 71.6, 58.7, 30.9. MALDI-TOF MS: *m/z* 837.3 (M+H)<sup>+</sup>. Anal. Calcd. for C<sub>40</sub>H<sub>44</sub>N<sub>4</sub>O<sub>16</sub>: C, 57.41; H, 5.30; N, 6.70. Found C, 57.20; H, 5.15; N, 6.82.

### 25,26,27,28-Tetrakis(ethoxymethoxy)-5,17-dinitrocalix[4]arene (**6**)

Yield: 43 %. Mp: 174-175 °C. <sup>1</sup>H NMR (CDCl<sub>3</sub>, 300 MHz): δ 7.65 (s, 4H), 6.54-6.59 (m, 6H), 4.56 (d, *J* = 13.7 Hz, 4H), 4.28 (d, *J* = 4.8 Hz, 4H), 4.07 (d, *J* = 4.8 Hz, 4H), 3.81 (d, *J* = 3.8 Hz, 4H), 3.76 (d, *J* = 3.8 Hz, 4H), 3.41 (s, 6H), 3.37 (s, 6H), 3.26 (d, *J* = 13.7 Hz, 4H). <sup>13</sup>C NMR (CDCl<sub>3</sub>, 75 MHz): δ 162.5, 155.6, 142.6, 136.8, 133.4, 128.7, 123.7, 123.3, 73.8, 73.5, 71.9, 71.7, 58.7, 58.6, 30.8. MALDI-TOF MS: *m/z* 747.5 (M+H)<sup>+</sup>. Anal. Calcd. for C<sub>40</sub>H<sub>46</sub>N<sub>2</sub>O<sub>12</sub>: C, 64.33; H, 6.21; N, 3.75. Found C, 64.10; H, 6.30; N, 3.81.

### 25,26,27,28-Tetrakis(ethoxymethoxy)-5,11,17,23-tetraiminoquinoline calix[4]arene (**1**)

To a solution of tetraaminocalix[4]arene (143 mg, 0.2 mmol) in a mixture of CH<sub>2</sub>Cl<sub>2</sub> (6 mL) and CH<sub>3</sub>CH<sub>2</sub>OH (6 mL) were added 2-quinolinecarboxaldehyde (126 mg, 0.8 mmol) and 5 Å molecular sieve. The mixture was stirred for one night at room temperature and then filtered. The filtrate was concentrated under reduced pressure, and the resulting residue was purified by recrystallization from CH<sub>2</sub>Cl<sub>2</sub> and CH<sub>3</sub>OH to give the pure compound **1** (173 mg) in 68% yield. Mp: 278-279 °C. <sup>1</sup>H NMR (CDCl<sub>3</sub>, 300 MHz): δ 8.56 (s, 4H), 8.04 (d, *J* = 8.5 Hz, 4H), 7.98 (d, *J* = 8.4 Hz, 4H), 7.64 (t, *J* = 8.5 Hz, 4H), 7.56 (t, *J* = 8.7 Hz, 4H), 7.44 (t, *J* = 7.1 Hz, 8H), 4.63 (d, *J* = 13.4 Hz, 4H), 4.23 (t, *J* = 5.1 Hz, 8H), 3.89 (t, *J* = 5.2 Hz, 8H), 3.46 (s, 12H), 3.31 (d, *J* = 13.5 Hz, 4H). <sup>13</sup>C NMR (CDCl<sub>3</sub>, 75 MHz): δ 158.4, 156.1, 155.2, 147.6, 145.0, 135.8, 135.5, 129.5, 129.4,

Anal. Calcd. for C<sub>80</sub>H<sub>72</sub>N<sub>8</sub>O<sub>8</sub>: C, 75.45; H, 5.70; N, 8.80. Found C, 75.20; H, 5.75; N, 8.72.

### 25,26,27,28-Tetrakis(ethoxymethoxy)-5,17-diiminoquinoline calix[4]arene (2)

It was synthesized by the similar method as **1**. Yield: 80%. Mp: 168-169 °C. <sup>1</sup>H NMR (CDCl<sub>3</sub>, 300 MHz):  $\delta$  8.51 (s, 2H), 8.03 (d,  $J$  = 8.4 Hz, 2H), 7.97 (d,  $J$  = 8.5 Hz, 2H), 7.64 (t,  $J$  = 8.5 Hz, 2H), 7.52 (t,  $J$  = 8.6 Hz, 2H), 7.49 (t,  $J$  = 7.3 Hz, 2H), 6.79 (s, 4H), 6.74-6.64 (m, 6H), 4.56 (d,  $J$  = 13.7 Hz, 4H), 4.28 (d,  $J$  = 4.8 Hz, 4H), 4.07 (d,  $J$  = 4.8 Hz, 4H), 3.81 (d,  $J$  = 3.8 Hz, 4H), 3.76 (d,  $J$  = 3.8 Hz, 4H), 3.41 (s, 6H), 3.37 (s, 6H), 3.26 (d,  $J$  = 13.7 Hz, 4H). <sup>13</sup>C NMR (CDCl<sub>3</sub>, 75 MHz):  $\delta$  157.6, 156.6, 156.5, 155.2, 147.6, 144.1, 135.9, 135.8, 134.8, 129.5, 129.3, 128.5, 128.4, 127.6, 127.0, 122.5, 121.6, 118.4, 73.1, 72.7, 71.7, 71.7, 58.6, 58.5, 45.5, 30.4. MALDI-TOF MS:  $m/z$  965.5 (M+H)<sup>+</sup>. Anal. Calcd. for C<sub>60</sub>H<sub>60</sub>N<sub>4</sub>O<sub>8</sub>: C, 76.47; H, 6.27; N, 5.81. Found C, 76.20; H, 6.35; N, 5.72.

### (2) General procedures for the absorption and fluorescence experiments

The absorption and fluorescence experiments reported in this paper were carried out in CH<sub>3</sub>CN. The resolution was set at 1 nm,  $\lambda_{\text{ex}}$  is 335 nm, and the excitation and emission slit widths were 10 nm. The samples were performed with a series of  $1.0 \times 10^{-5}$  M HPLC acetonitrile solutions of compounds **1** and **2**. Metal perchlorates were performed with  $1.0 \times 10^{-3}$  M. The sample was performed with  $1.0 \times 10^{-5}$  M.

### (3) Job plot for compound **1** and Cu<sup>2+</sup>

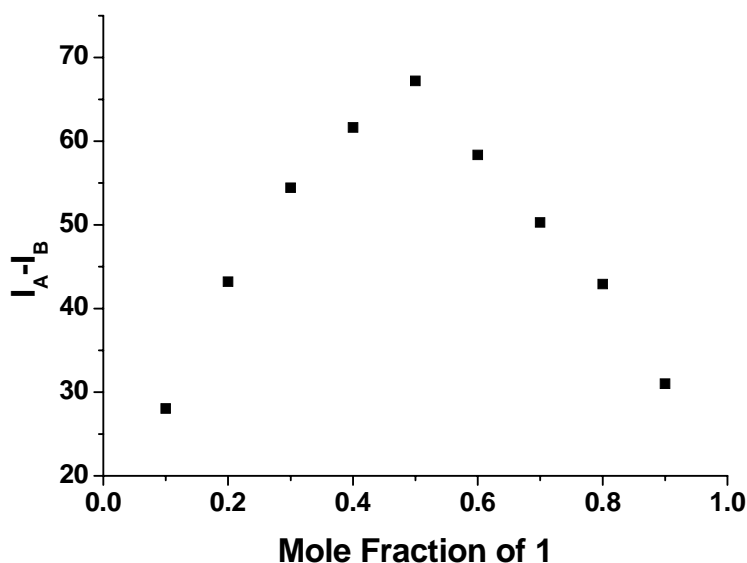

**Figure S1.** Job plot for **1** and Cu(ClO<sub>4</sub>)<sub>2</sub>: [**1**] + [Cu<sup>2+</sup>] =  $1.0 \times 10^{-5}$  mol L<sup>-1</sup> in CH<sub>3</sub>CN.  $\lambda_{\text{ex}}$  = 335 nm,  $\lambda_{\text{em}}$  = 412 nm.

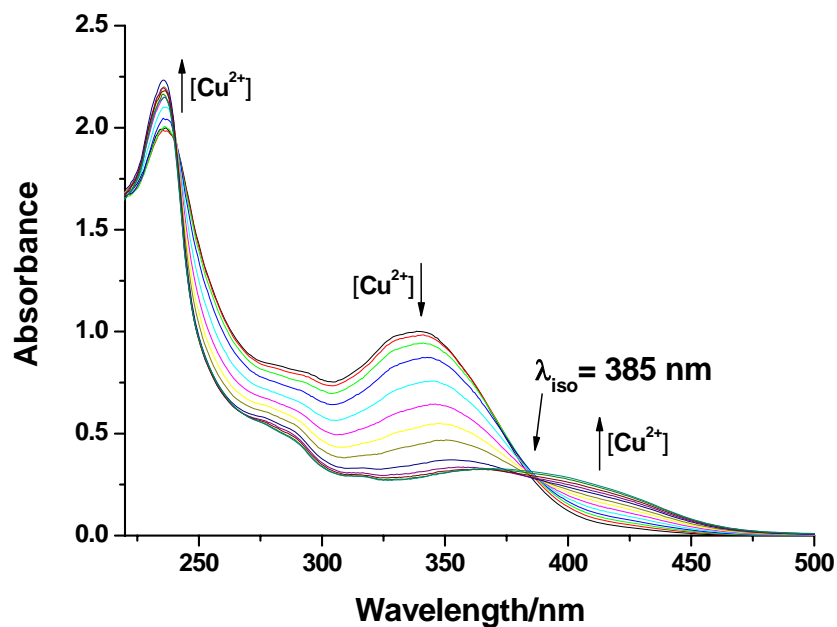

**Figure S2.** Absorption spectra of **1** ( $1 \times 10^{-5}$  M) in the presence of  $\text{Cu}(\text{ClO}_4)_2$  in  $\text{CH}_3\text{CN}$ .  $[\text{Cu}^{2+}]$ : 1.0, 2.0, 3.0, 4.0, 5.0, 6.0, 7.0, 8.0, 9.0, 10.0, 11.0, 12.0  $\times 10^{-6}$  M.

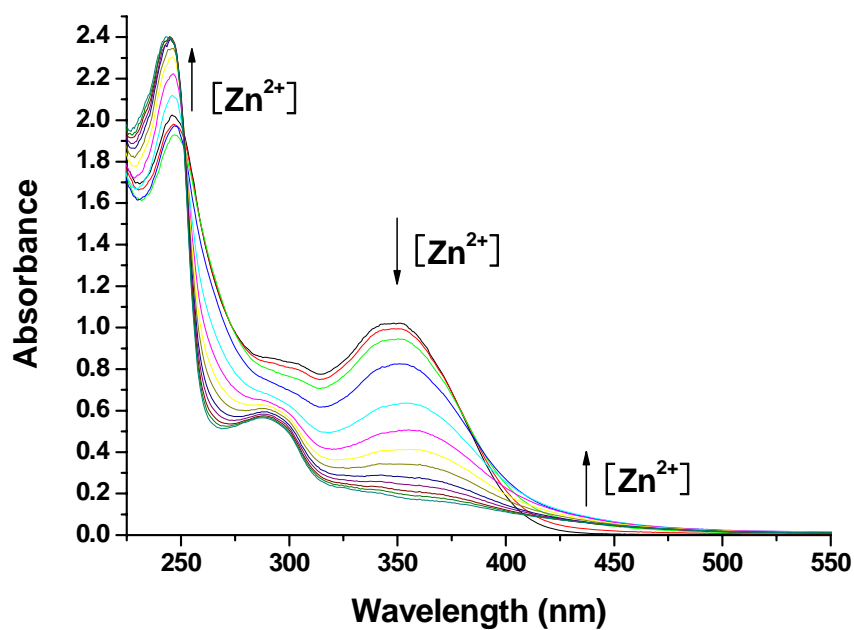

**Figure S3.** Absorption spectra of **1** ( $1 \times 10^{-5}$  M) in the presence of  $\text{Zn}(\text{ClO}_4)_2$  in  $\text{CH}_3\text{CN}$ .  $[\text{Zn}^{2+}]$ : 2.0, 4.0, 6.0, 8.0, 10.0, 12.0, 14.0, 16.0, 18.0, 20.0, 24.0, 26.0  $\times 10^{-6}$  M.

(5) Fluorescent titration of 1 with Zn<sup>2+</sup>

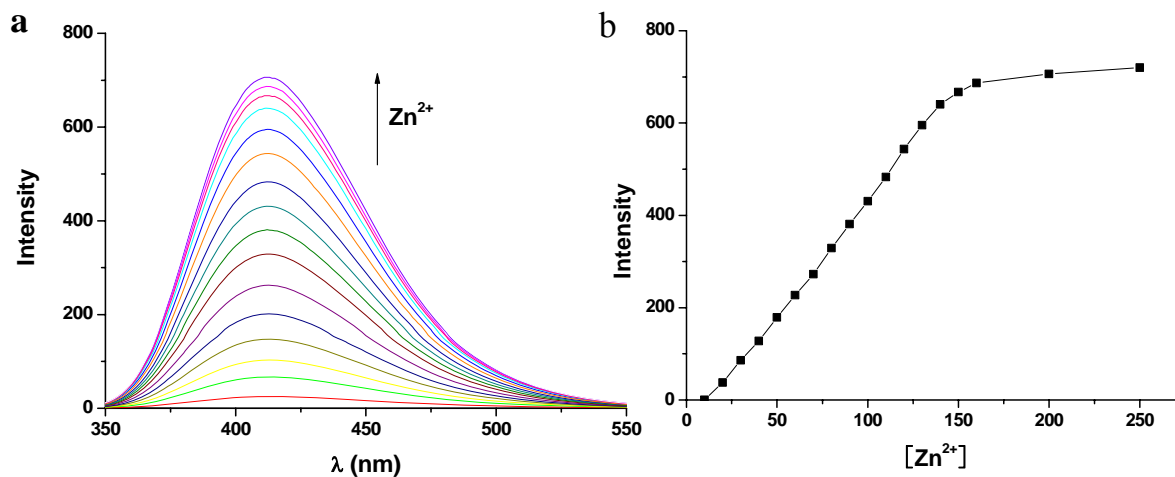

**Figure S4.** (a) Fluorescence emission spectra of **1** ( $1 \times 10^{-5}$  M) in the presence of  $\text{Zn}(\text{ClO}_4)_2$  in  $\text{CH}_3\text{CN}$ .  $[\text{Zn}^{2+}]$ : 10.0, 20.0, 30.0, 40.0, 50.0, 60.0, 70.0, 80.0, 90.0, 100.0, 110.0, 120.0, 130.0, 140.0, 150.0, 160.0, 200, 250  $\times 10^{-5}$  M.  $\lambda_{\text{ex}} = 335$  nm. (b) Plot of  $I/I_0$  versus  $[\text{Zn}^{2+}]$ .

(6) Fluorescent titration of 2 with Cu<sup>2+</sup>

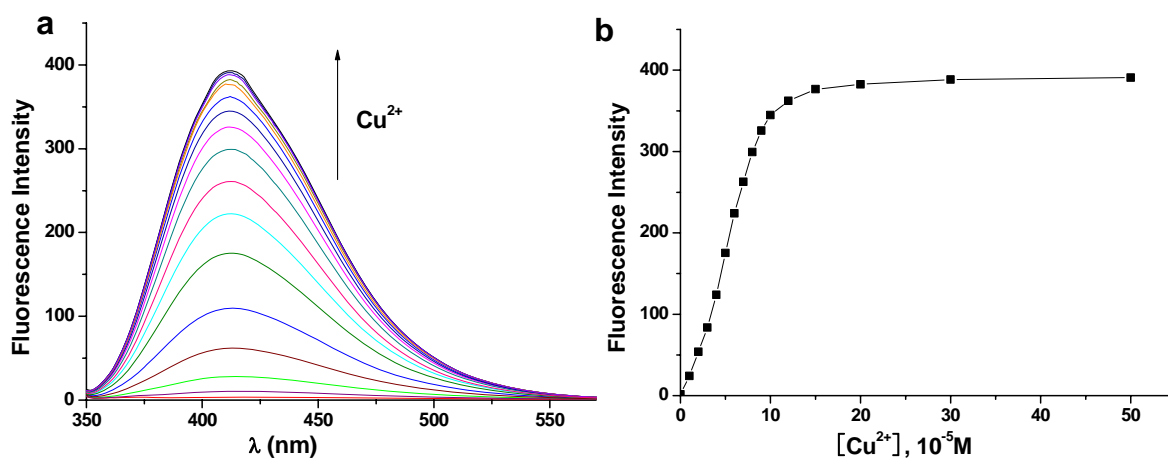

**Figure S5.** (a) Fluorescence emission spectra of **2** ( $1.0 \times 10^{-5}$  M) in the presence of  $\text{Cu}(\text{ClO}_4)_2$  in  $\text{CH}_3\text{CN}$ .  $[\text{Cu}^{2+}]$ : 1.0, 2.0, 3.0, 4.0, 5.0, 6.0, 7.0, 8.0, 9.0, 10.0, 12.0, 15.0, 20.0, 30.0, 50.0  $\times 10^{-5}$  M.  $\lambda_{\text{ex}} = 335$  nm. (b) Plot of  $I_f$  versus  $[\text{Cu}^{2+}]$ .

(7) Plot of fluorescence intensity versus metal ion concentration

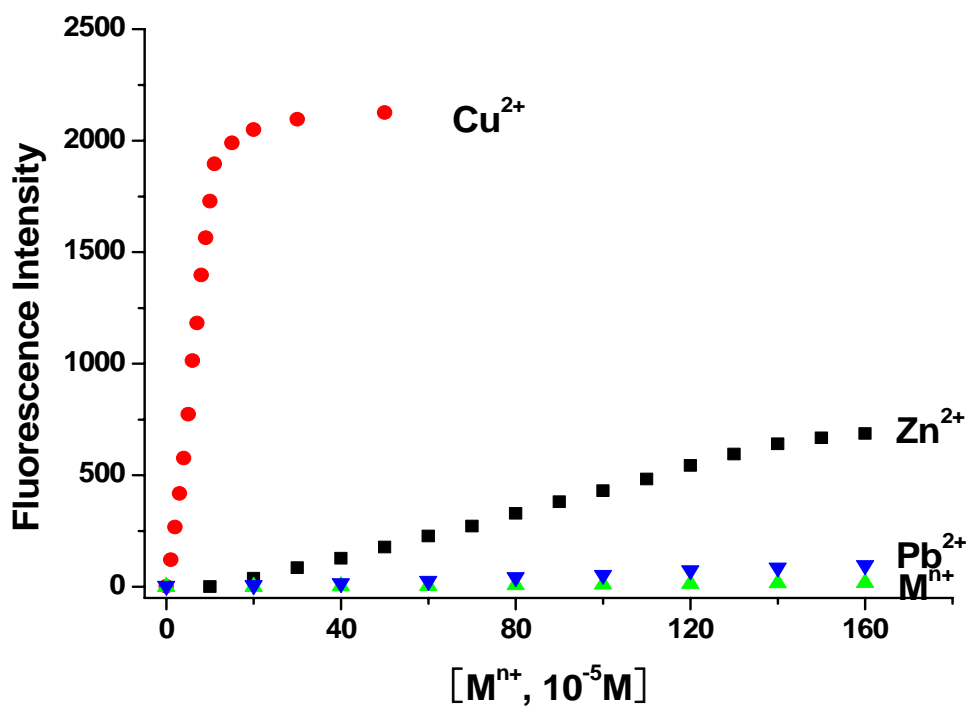

**Figure S6.** Plot of  $I_f$  versus metal ion concentration.  $[1] = 1 \times 10^{-5} M$ ,  $\lambda_{ex} = 335 \text{ nm}$ ,  $\lambda_{em} = 412 \text{ nm}$ .  $M^{n+}$  represent  $Li^+$ ,  $Na^+$ ,  $K^+$ ,  $Mg^{2+}$ ,  $Ca^{2+}$ ,  $Ba^{2+}$ ,  $Fe^{3+}$ ,  $Mn^{2+}$ ,  $Co^{2+}$ ,  $Ni^{2+}$ ,  $Cd^{2+}$ ,  $Ag^+$ ,  $Hg^{2+}$ .

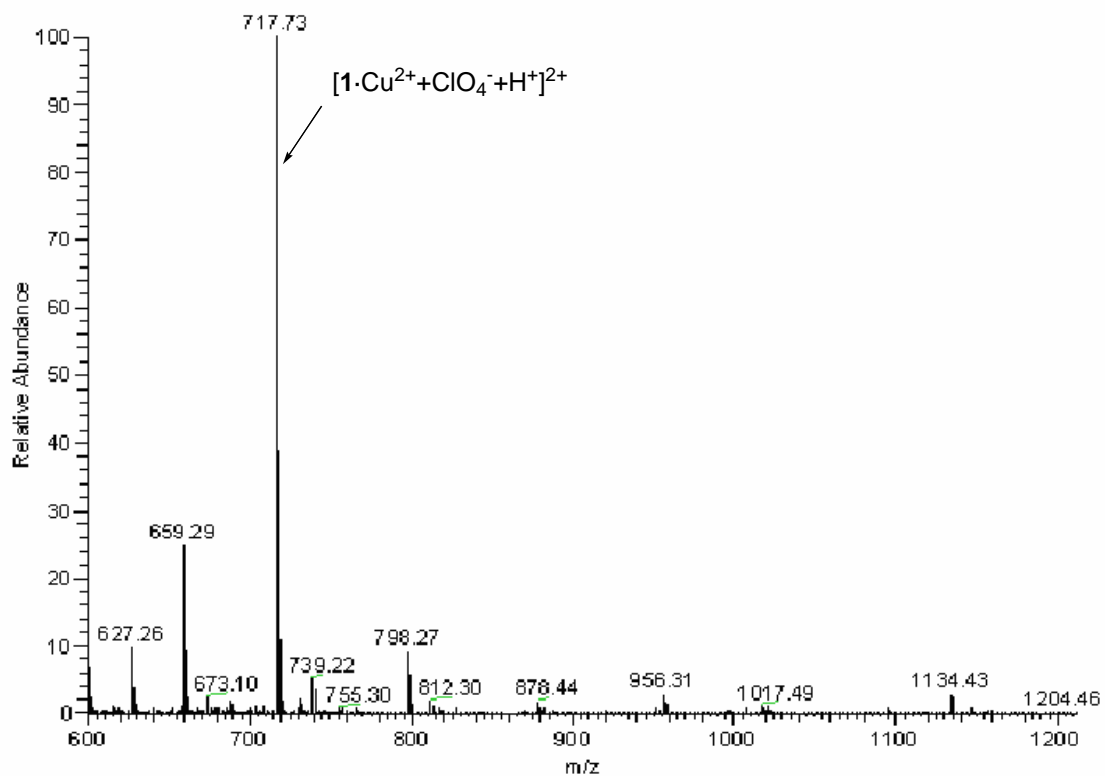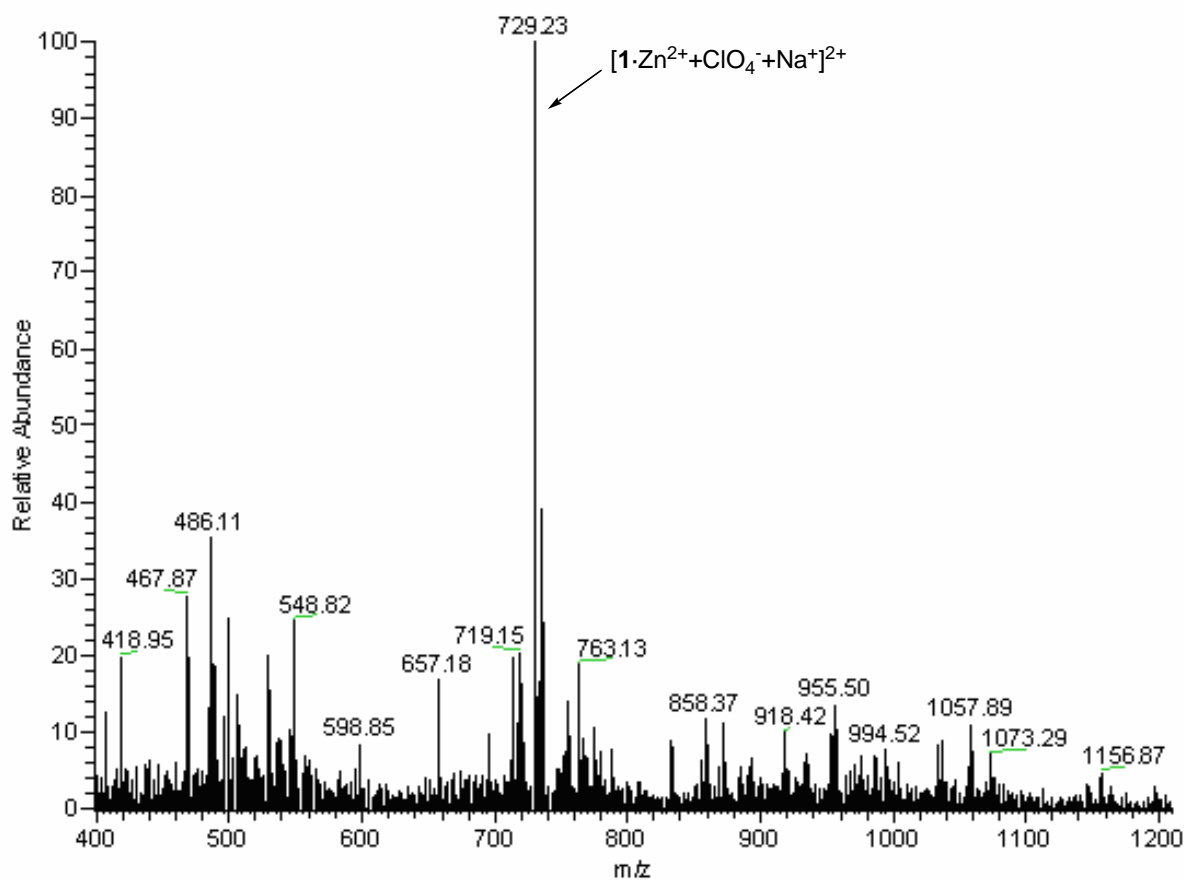

**(9) The  $^1\text{H}$  NMR titration of compound **1** with  $\text{Zn}^{2+}$**

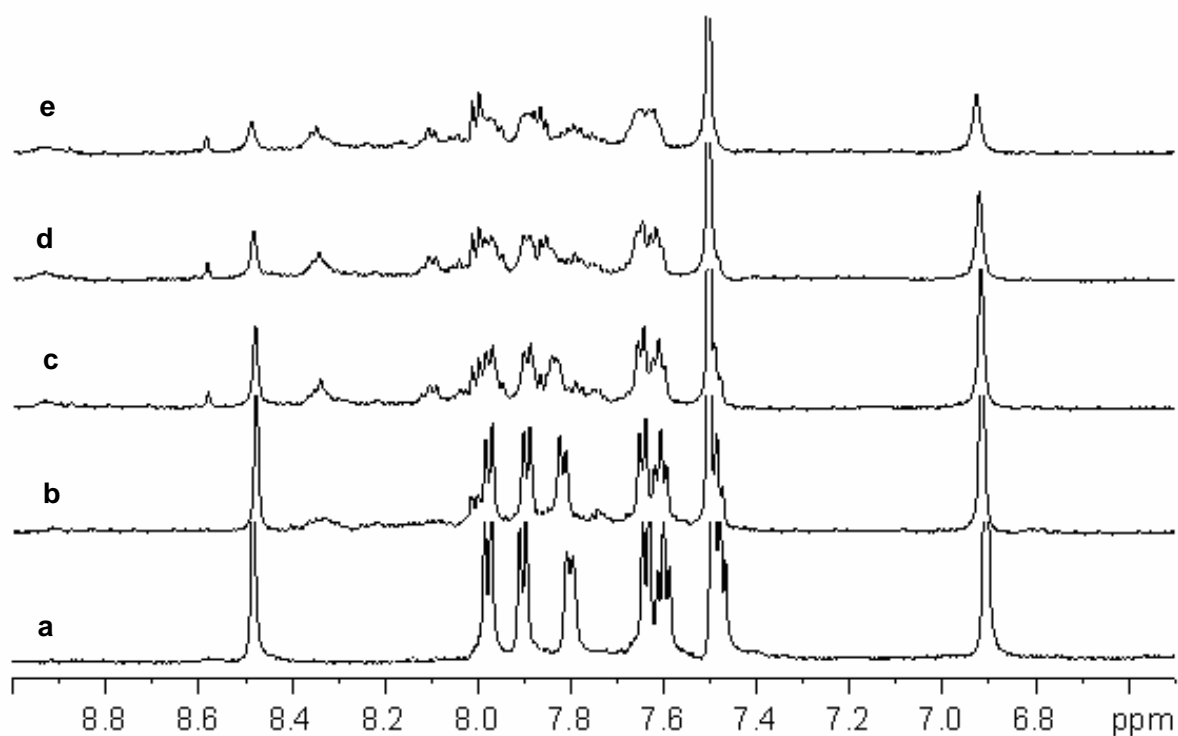

**Figure S7.** The  $^1\text{H}$  NMR (298K, 600MHz) titrations of compound **1** ( $2 \times 10^{-3}$  M) with  $\text{Zn}^{2+}$  in the mixture solution of  $\text{CDCl}_3$  and  $\text{CD}_3\text{CN}$  (1:1). a-e:  $[\text{Cu}^{2+}]$ : 0, 0.5, 1.0, 1.5,  $2.0 \times 10^{-3}$  M.



(10) The <sup>1</sup>H NMR and <sup>13</sup>C NMR spectra of compounds 1, 2, 4, 6  
 This journal is (c) The Royal Society of Chemistry 2008

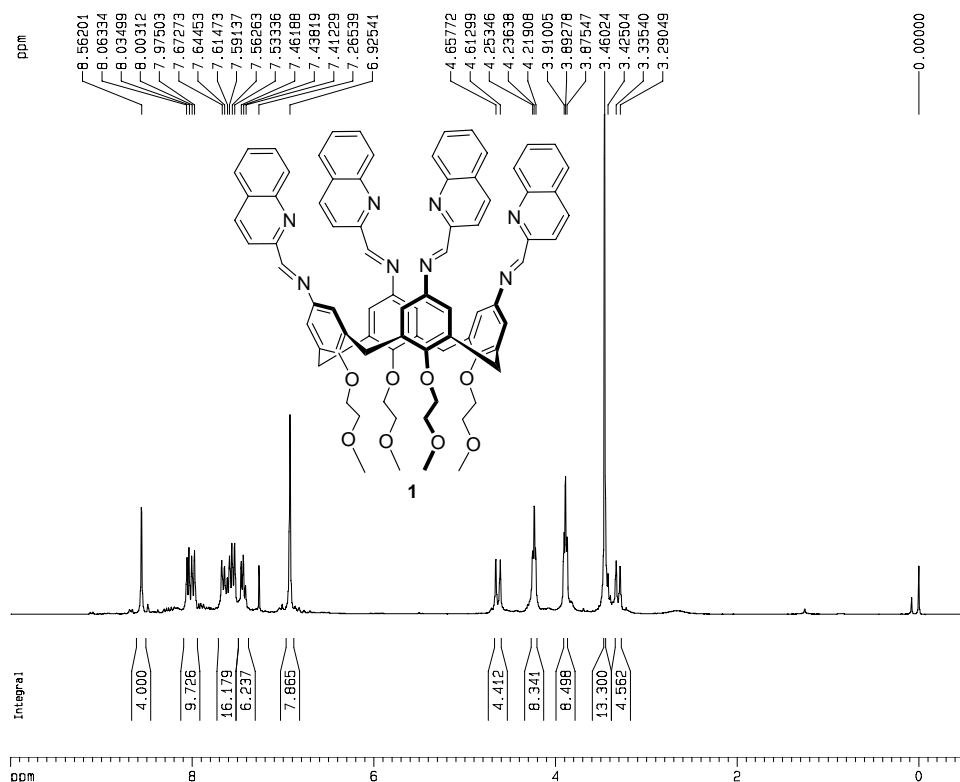

Current Data Parameters  
 NAME 1gk-071226-3  
 EXPNO 1  
 PROCNO 1

F2 - Acquisition Parameters  
 Date\_ 20071226  
 Time 18.03  
 INSTRUM av300  
 PROBHND 5 mm DUL 13C-1  
 PULPROG zg30  
 TD 65536  
 SOLVENT CDCl3  
 NS 10  
 DS 0  
 SWH 6992.806 Hz  
 FIDRES 0.137219 Hz  
 AQ 3.6438515 sec  
 RG 128  
 DW 55.600 usec  
 DE 6.00 usec  
 TE 295.8 K  
 D1 5.0000000 sec

===== CHANNEL f1 =====  
 NUC1 1H  
 P1 10.60 usec  
 PL1 -1.00 dB  
 SFO1 300.1318534 MHz

F2 - Processing parameters  
 S1 32768  
 SF 300.1300040 MHz  
 WDW EM  
 SSB 0  
 LB 0.35 Hz  
 GB 0  
 PC 1.00

1D NMR plot parameters  
 CX 20.00 cm  
 CY 12.50 cm  
 F1P 10.000 ppm  
 F1 3001.30 Hz  
 F2P -0.500 ppm  
 F2 -150.06 Hz  
 PPMCM 0.52500 ppm/cm  
 HZCM 157.56825 Hz/cm

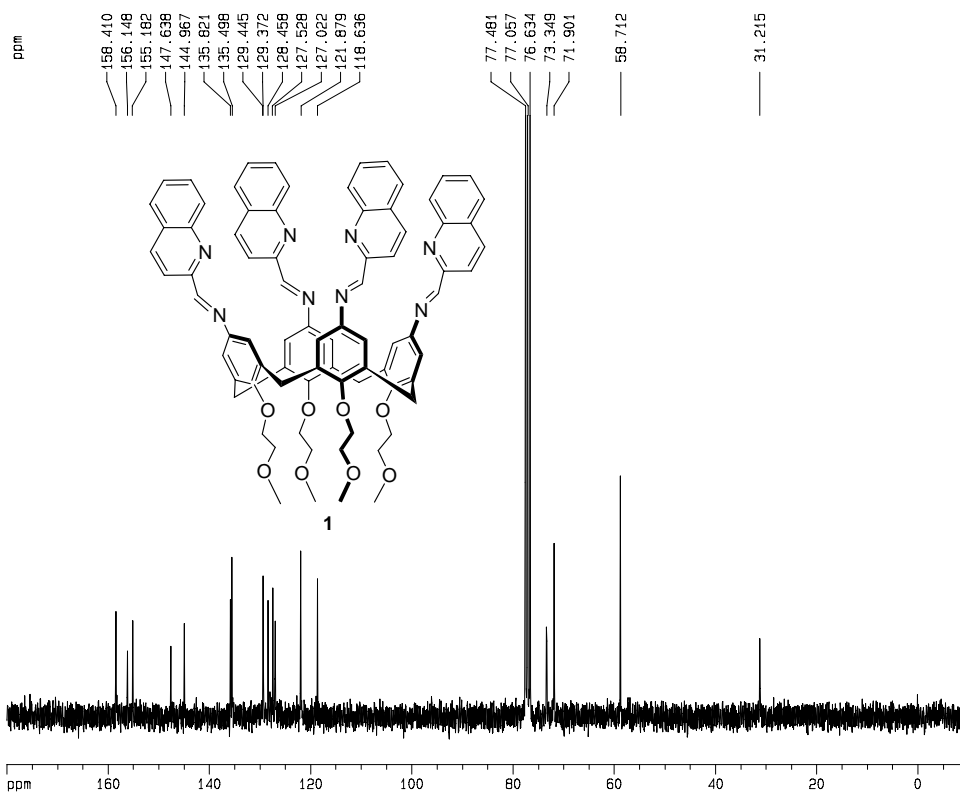

Current Data Parameters  
 NAME 1gk-071226-3  
 EXPNO 3  
 PROCNO 1

F2 - Acquisition Parameters  
 Date\_ 20071226  
 Time 18.08  
 INSTRUM av300  
 PROBHND 5 mm DUL 13C-1  
 PULPROG zgpg30  
 TD 65536  
 SOLVENT CDCl3  
 NS 113  
 DS 4  
 SWH 17985.611 Hz  
 FIDRES 0.274439 Hz  
 AQ 1.8219508 sec  
 RG 812.7  
 DW 27.800 usec  
 DE 6.00 usec  
 TE 295.8 K  
 D1 2.0000000 sec  
 d11 0.0300000 sec  
 d12 0.00002000 sec

===== CHANNEL f1 =====  
 NUC1 13C  
 P1 12.20 usec  
 PL1 -0.32 dB  
 SFO1 75.4752953 MHz

===== CHANNEL f2 =====  
 CPDPRG2 waltz16  
 NUC2 1H  
 P2P2 80.00 usec  
 PL2 -1.00 dB  
 PL12 16.56 dB  
 PL13 18.00 dB  
 SFO2 300.1312005 MHz

F2 - Processing parameters  
 S1 32768  
 SF 75.4677480 MHz  
 WDW EM  
 SSB 0  
 LB 1.00 Hz  
 GB 0  
 PC 1.40

1D NMR plot parameters  
 CX 20.00 cm  
 CY 5.00 cm  
 F1P 180.000 ppm  
 F1 13584.20 Hz  
 F2P -10.000 ppm  
 F2 -754.68 Hz  
 PPMCM 9.58000 ppm/cm  
 HZCM 716.54360 Hz/cm

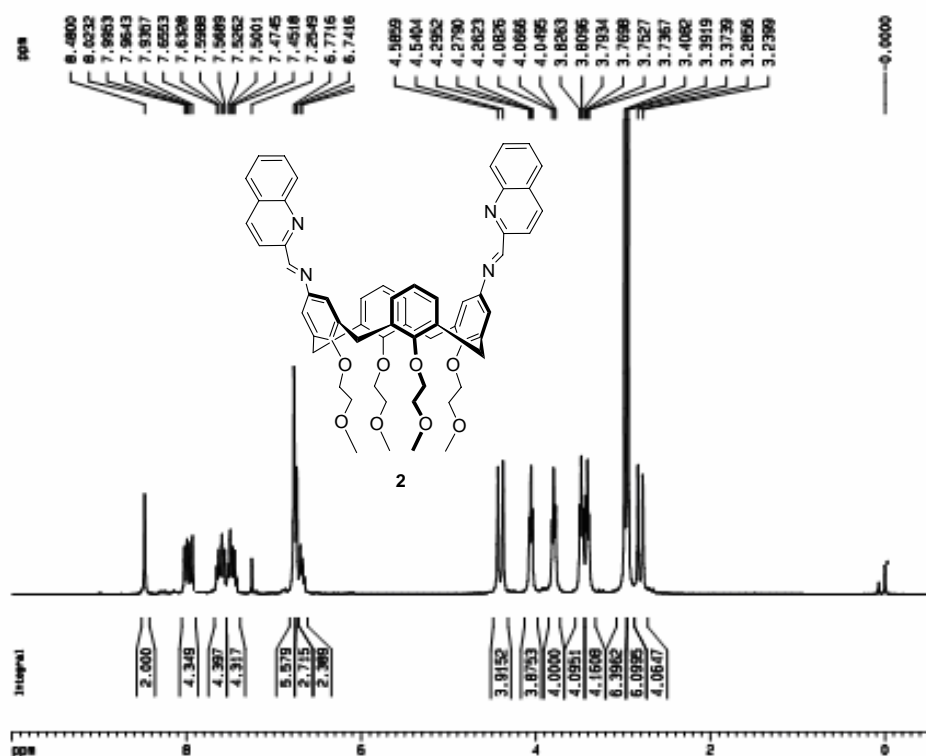

Current Data Parameters  
 NAME 1q-071209-2  
 EXPNO 2  
 PROCNO 1

F2 - Acquisition Parameters  
 Date\_ 20071209  
 Time 14.27  
 INSTRUM spect  
 PROBHD 5 mm QNP 15C-1  
 PULPROG zgpg30  
 TD 65536  
 SOLVENT CDCl3  
 NS 16  
 DS 4  
 SWH 8992.866 Hz  
 FIDRES 0.137219 Hz  
 AQ 3.6438615 sec  
 RG 102.8  
 SH 10.000 usec  
 TC 6.00 usec  
 TE 298.2 K  
 SI 6.0000000 sec

===== CHANNEL f1 =====  
 NUC1 13C  
 P1 10.00 usec  
 PL1 -1.00 dB  
 SFO1 300.1318534 MHz

F2 - Processing parameters  
 SI 32768  
 SF 300.1300612 MHz  
 GM 0  
 SSB 0  
 LB 0.30 Hz  
 GB 0  
 PC 1.00

ID 1H NMR parameters  
 CX 20.00 cm  
 CY 5.00 cm  
 F1 10.000 ppm  
 F2 300.130 MHz  
 F3 0.000 ppm  
 F4 -100.00 Hz  
 F5 0.000 ppm/cm  
 KDCM 337.00828 Hz/cm

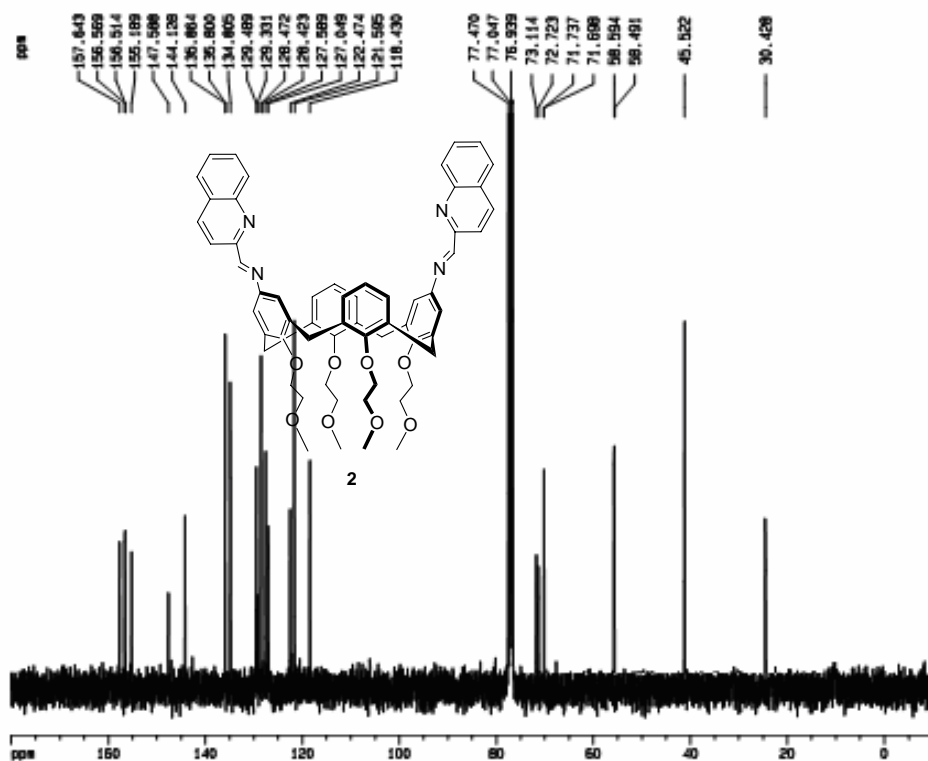

Current Data Parameters  
 NAME 1q-071209-2  
 EXPNO 3  
 PROCNO 1

F2 - Acquisition Parameters  
 Date\_ 20071209  
 Time 14.29  
 INSTRUM spect  
 PROBHD 5 mm QNP 15C-1  
 PULPROG zgpg30  
 TD 65536  
 SOLVENT CDCl3  
 NS 16  
 DS 4  
 SWH 17085.821 Hz  
 FIDRES 0.214438 Hz  
 AQ 1.6219580 sec  
 RG 102.7  
 SH 10.000 usec  
 TC 6.00 usec  
 TE 297.5 K  
 SI 2.0000000 sec  
 SI1 6.0000000 sec  
 SI2 6.0000000 sec

===== CHANNEL f1 =====  
 NUC1 13C  
 P1 12.00 usec  
 PL1 -0.30 dB  
 SFO1 76.4705883 MHz

===== CHANNEL f2 =====  
 DPROG2 waltz16  
 NUC2 1H  
 PCPD2 80.00 usec  
 PL2 -1.00 dB  
 PL3 16.00 dB  
 PL4 16.00 dB  
 SFO2 300.1315006 MHz

F2 - Processing parameters  
 SI 32768  
 SF 76.467490 MHz  
 GM 0  
 SSB 0  
 LB 1.00 Hz  
 GB 0  
 PC 1.40

ID 1H NMR parameters  
 CX 20.00 cm  
 CY 5.00 cm  
 F1 100.000 ppm  
 F2 126.470 MHz  
 F3 -10.000 ppm  
 F4 -754.00 Hz  
 F5 0.000 ppm/cm  
 KDCM 718.34080 Hz/cm

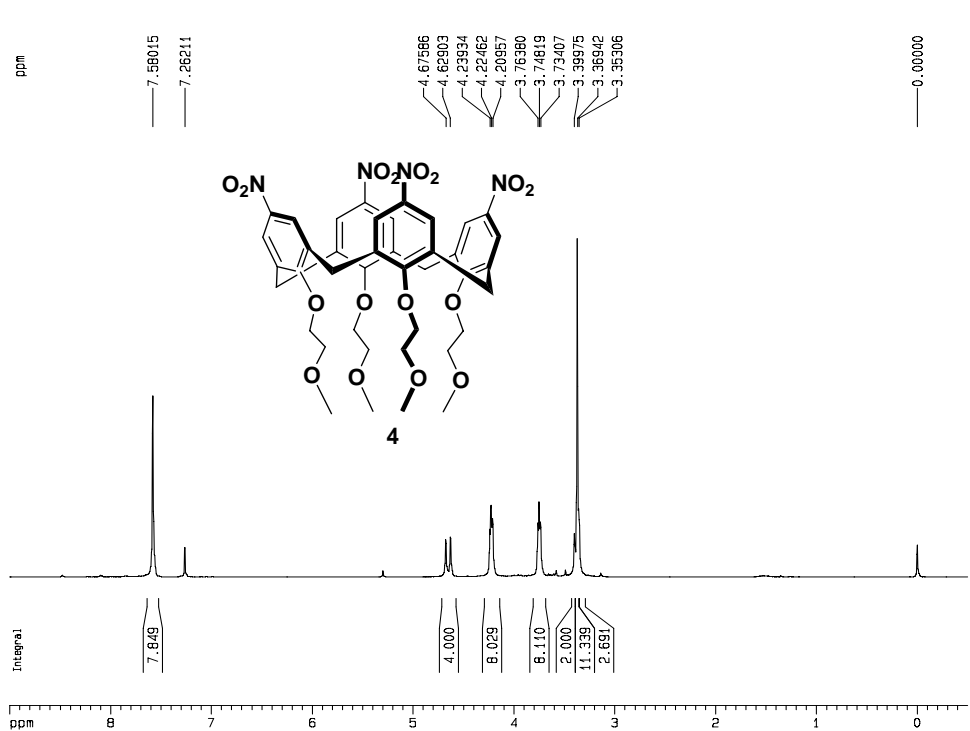

```

Current Data Parameters
NAME      Iqk-070507-2
EXPNO    10
PROCNO   1

F2 - Acquisition Parameters
Date_    20070507
Time     21.36
INSTRUM  av300
PROBHD   5 mm DUL 13C-1
PULPROG  zg30
TD        65536
SOLVENT  CDCl3
NS        16
DS        0
SWH       8992.806 Hz
FIDRES    0.137219 Hz
AQ        3.6438515 sec
RG         574.7
DW         55.600 usec
DE         6.00 usec
TE         302.9 K
D1         5.0000000 sec

===== CHANNEL f1 =====
NUC1      1H
P1         9.30 usec
PL1        -1.00 dB
SFO1      300.1318534 MHz

F2 - Processing parameters
SI         32768
SF         300.1300058 MHz
WDW        EM
SSB         0
LB         0.35 Hz
GB         0
PC         1.00

1D NMR plot parameters
CX         20.00 cm
CY         6.00 cm
F1P        9.000 ppm
F1         2701.17 Hz
F2P        -0.500 ppm
F2         -150.06 Hz
PPMCM      0.47500 ppm/cm
HZCM       142.56175 Hz/cm
    
```

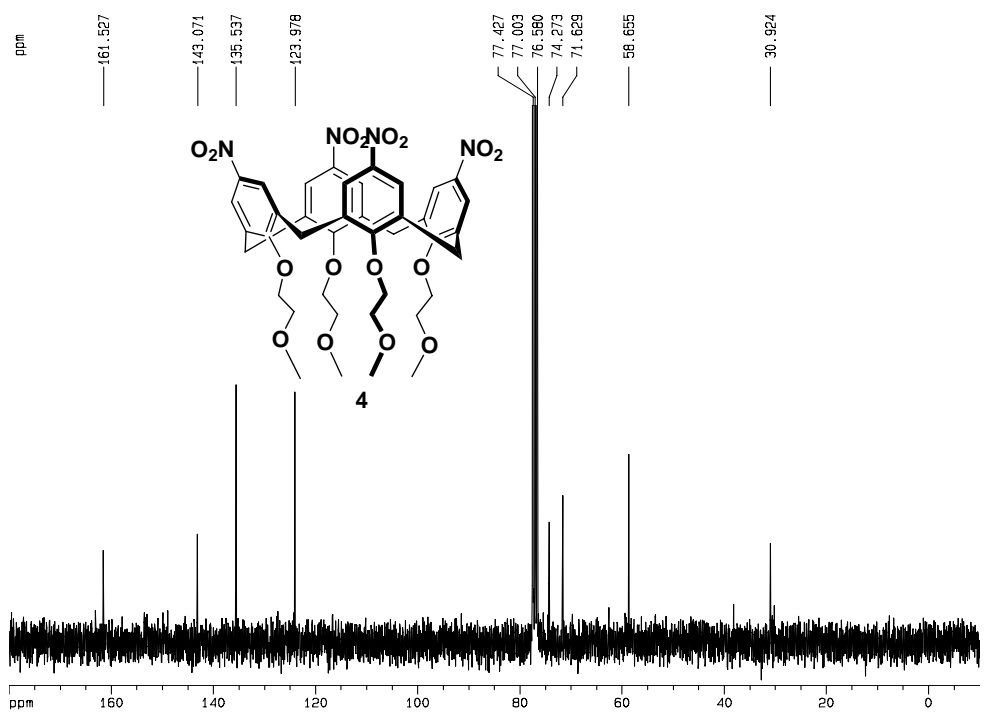

```

Current Data Parameters
NAME      Iqk-070507-2
EXPNO    11
PROCNO   1

F2 - Acquisition Parameters
Date_    20070507
Time     21.44
INSTRUM  av300
PROBHD   5 mm DUL 13C-1
PULPROG  zgpg30
TD        65536
SOLVENT  CDCl3
NS        256
DS         4
SWH       17986.611 Hz
FIDRES    0.274439 Hz
AQ        1.6219508 sec
RG         5160.6
DW         27.800 usec
DE         6.00 usec
TE         303.2 K
D1         2.0000000 sec
d11       0.0300000 sec
d12       0.0000200 sec

===== CHANNEL f1 =====
NUC1      13C
P1         9.40 usec
PL1        -1.00 dB
SFO1      75.4752953 MHz

===== CHANNEL f2 =====
CPDPRG2  waltz16
NUC2      1H
PCPD2     80.00 usec
PL2        -1.00 dB
PL12       18.00 dB
PL13       18.00 dB
SFO2      300.1312005 MHz

F2 - Processing parameters
SI         32768
SF         75.4677480 MHz
WDW        EM
SSB         0
LB         1.00 Hz
GB         0
PC         1.40

1D NMR plot parameters
CX         20.00 cm
CY         6.00 cm
F1P       180.000 ppm
F1        13584.20 Hz
F2P       -10.000 ppm
F2         -754.66 Hz
PPMCM     9.50000 ppm/cm
HZCM      716.94360 Hz/cm
    
```

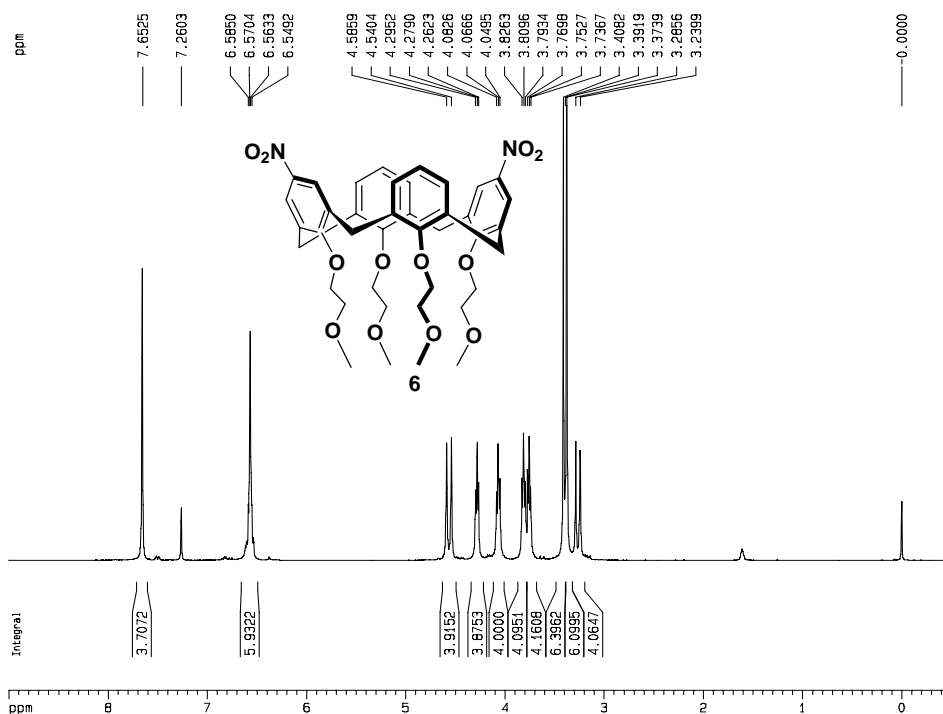

```

Current Data Parameters
NAME      1gk-070430
EXPNO    10
PROCNO   1

F2 - Acquisition Parameters
Date_    20070430
Time     10.33
INSTRUM  av300
PROBHD   5 mm DUL 13C-1
PULPROG  zg30
TD        65536
SOLVENT  CDCl3
NS        16
DS        0
SWH       8992.806 Hz
FIDRES   0.137219 Hz
AQ        3.6438515 sec
RG        181
DW        55.600 usec
DE        6.00 usec
TE        299.6 K
J1        5.00000000 sec

===== CHANNEL f1 =====
NUC1      1H
P1        9.30 usec
PL1       -1.00 dB
SFO1      300.1318534 MHz

F2 - Processing parameters
SI        32768
SF        300.1300062 MHz
WDW       EM
SSB       0
LB        0.35 Hz
GB        0
PC        1.00

1D NMR plot parameters
CX        20.00 cm
CY        12.50 cm
F1P       9.000 ppm
F1        2701.17 Hz
F2P       -0.500 ppm
F2        -150.05 Hz
P1MCM    0.47500 ppm/cm
H2CM     142.56175 Hz/cm
    
```

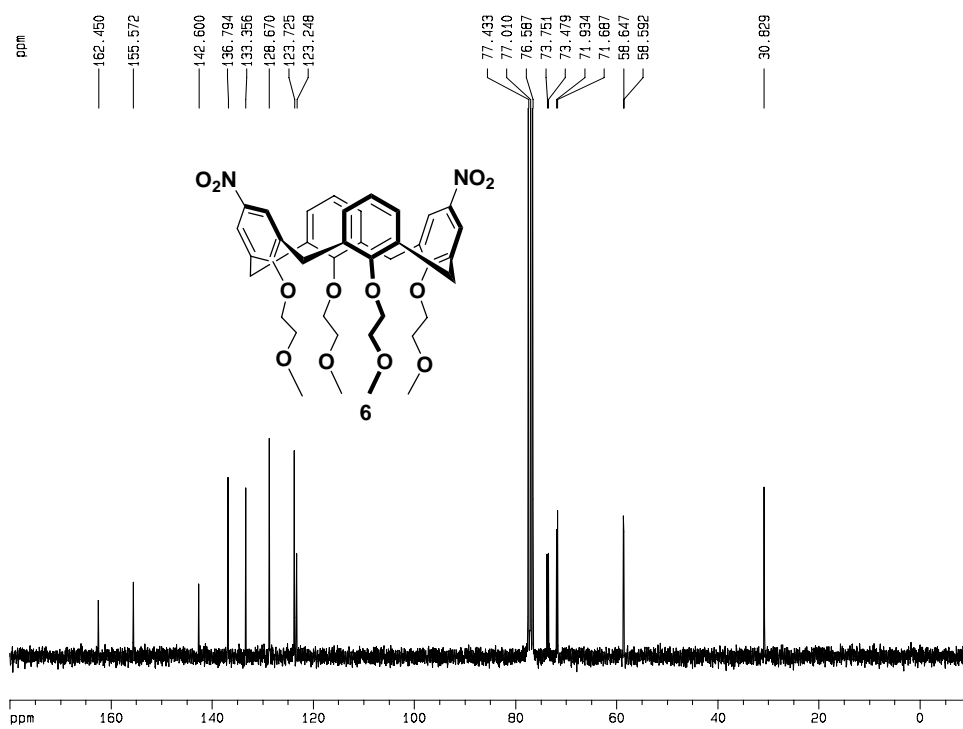

```

Current Data Parameters
NAME      1gk-070430
EXPNO    11
PROCNO   1

F2 - Acquisition Parameters
Date_    20070430
Time     10.37
INSTRUM  av300
PROBHD   5 mm DUL 13C-1
PULPROG  zgpg30
TD        65536
SOLVENT  CDCl3
NS        361
DS        4
SWH       17985.511 Hz
FIDRES   0.274439 Hz
AQ        1.8219356 sec
RG        1290.2
DW        27.800 usec
DE        6.00 usec
TE        299.9 K
J1        2.00000000 sec
J11       0.03000000 sec
J12       0.00002000 sec

===== CHANNEL f1 =====
NUC1      13C
P1        9.40 usec
PL1       -1.00 dB
SFO1      75.4752953 MHz

===== CHANNEL f2 =====
CPDPRG2  waltz16
NUC2      1H
PCPD2     80.00 usec
PL2       -1.00 dB
PL12      18.00 dB
PL13      18.00 dB
SFO2      300.1312005 MHz

F2 - Processing parameters
SI        32768
SF        75.4677490 MHz
WDW       EM
SSB       0
LB        1.00 Hz
GB        0
PC        1.40

1D NMR plot parameters
CX        20.00 cm
CY        5.00 cm
F1P       180.000 ppm
F1        13584.20 Hz
F2P       -10.000 ppm
F2        -754.68 Hz
P1MCM    9.50000 ppm/cm
H2CM     716.94360 Hz/cm
    
```
